# Supplementary material for: Ecotoxicology Evaluation of a Fenton—Type Process Catalyzed with Lamellar Structures Impregnated with Fe or Cu for the Removal of Amoxicillin and Glyphosate
Source: MDPI journal article supplement (doi:10.3390/ijerph20247172), 2023-12-13
Supplement: s1 [file s1]

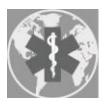

## Supplementary material

**Table S1:** Results of the statistical analyzes carried out in the bioassays and the mutagenicity index are

- ***Lactuca sativa* amoxicillin (Amx)**

One-factor variance analysis

### SUMMARY

| Groups    | Account | Addition | Average | Variance  |
|-----------|---------|----------|---------|-----------|
| treatment | 5       | 15       | 3       | 2,5       |
| 100       | 5       | 174,9    | 34,98   | 256,60435 |

### VARIANCE ANALYSIS

| Origin of variations | Sum of squares | Degrees of freedom | mean squares | F           | Probability | Critical value for F |
|----------------------|----------------|--------------------|--------------|-------------|-------------|----------------------|
| Between groups       | 2556,801       | 1                  | 2556,801     | 19,73568564 | 0,002160785 | 5,317655072          |
| Within the groups    | 1036,4174      | 8                  | 129,552175   |             |             |                      |
| Total                | 3593,2184      | 9                  |              |             |             |                      |

- ***Lactuca sativa* glyphosate (Gly)**

One-factor variance analysis

### SUMMARY

| Groups    | Account | Addition | Average | Variance |
|-----------|---------|----------|---------|----------|
| treatment | 5       | 15       | 3       | 2,5      |
| 100%      | 5       | 245,78   | 49,156  | 53,03273 |

### VARIANCE ANALYSIS

| Origin of variations | Sum of squares | Degrees of freedom | mean squares | F           | Probability | Critical value for F |
|----------------------|----------------|--------------------|--------------|-------------|-------------|----------------------|
| Between groups       | 5325,94084     | 1                  | 5325,94084   | 191,8126784 | 7,14171E-07 | 5,317655072          |
| Within the groups    | 222,13092      | 8                  | 27,766365    |             |             |                      |
| Total                | 5548,07176     | 9                  |              |             |             |                      |

- ***Selenastrum capricornutum* amoxicillin (Amx)**

One-factor variance analysis

SUMMARY

| <i>Groups</i> | <i>Account</i> | <i>Addition</i> | <i>Average</i> | <i>Variance</i> |
|---------------|----------------|-----------------|----------------|-----------------|
| treatment     | 5              | 15              | 3              | 2,5             |
| 10%           | 5              | 270             | 54             | 2008            |

VARIANCE ANALYSIS

| <i>Origin of variations</i> | <i>Sum of squares</i> | <i>Degrees of freedom</i> | <i>mean squares</i> | <i>F</i>    | <i>Probability</i> | <i>Critical value for F</i> |
|-----------------------------|-----------------------|---------------------------|---------------------|-------------|--------------------|-----------------------------|
| Between groups              | 6502,5                | 1                         | 6502,5              | 6,468540164 | 0,034531176        | 5,317655072                 |
| Within the groups           | 8042                  | 8                         | 1005,25             |             |                    |                             |
| Total                       | 14544,5               | 9                         |                     |             |                    |                             |

- ***Selenastrum capricornutum* glyphosate (Gly)**

One-factor variance analysis

SUMMARY

| <i>Groups</i> | <i>Account</i> | <i>Addition</i> | <i>Average</i> | <i>Variance</i> |
|---------------|----------------|-----------------|----------------|-----------------|
| treatment     | 5              | 15              | 3              | 2,5             |
| 10%           | 5              | 329             | 65,8           | 1044,2          |

VARIANCE ANALYSIS

| <i>Origin of variations</i> | <i>Sum of squares</i> | <i>Degrees of freedom</i> | <i>mean squares</i> | <i>F</i>    | <i>Probability</i> | <i>Critical value for F</i> |
|-----------------------------|-----------------------|---------------------------|---------------------|-------------|--------------------|-----------------------------|
| Between groups              | 9859,6                | 1                         | 9859,6              | 18,83940002 | 0,002476927        | 5,317655072                 |
| Within the groups           | 4186,8                | 8                         | 523,35              |             |                    |                             |
| Total                       | 14046,4               | 9                         |                     |             |                    |                             |

- ***Daphnia magna* amoxicillin (Amx)**

One-factor variance analysis

SUMMARY

| <i>Groups</i> | <i>Account</i> | <i>Addition</i> | <i>Average</i> | <i>Variance</i> |
|---------------|----------------|-----------------|----------------|-----------------|
| treatment     | 5              | 15              | 3              | 2,5             |
| 25%           | 5              | 149             | 29,8           | 726,7           |

VARIANCE ANALYSIS

| <i>Origin of variations</i> | <i>Sum of squares</i> | <i>Degrees of freedom</i> | <i>mean squares</i> | <i>F</i>   | <i>Probability</i> | <i>Critical value for F</i> |
|-----------------------------|-----------------------|---------------------------|---------------------|------------|--------------------|-----------------------------|
| Between groups              | 1795,6                | 1                         | 1795,6              | 5,92484915 | 0,057253499        | 5,317655072                 |
| Within the groups           | 2916,8                | 8                         | 364,6               |            |                    |                             |
| Total                       | 4712,4                | 9                         |                     |            |                    |                             |

- ***Daphnia magna* glyphosate (Gly)**

One-factor variance analysis

SUMMARY

| <i>Groups</i> | <i>Account</i> | <i>Addition</i> | <i>Average</i> | <i>Variance</i> |
|---------------|----------------|-----------------|----------------|-----------------|
| treatment     | 5              | 15              | 3              | 2,5             |
| 25%           | 5              | 264             | 52,8           | 474,7           |

VARIANCE ANALYSIS

| <i>Origin of variations</i> | <i>Sum of squares</i> | <i>Degrees of freedom</i> | <i>mean squares</i> | <i>F</i>   | <i>Probability</i> | <i>Critical value for F</i> |
|-----------------------------|-----------------------|---------------------------|---------------------|------------|--------------------|-----------------------------|
| Between groups              | 6200,1                | 1                         | 6200,1              | 25,9853311 | 0,000932633        | 5,317655072                 |
| Within the groups           | 1908,8                | 8                         | 238,6               |            |                    |                             |
| Total                       | 8108,9                | 9                         |                     |            |                    |                             |

- ***S. typhimurium* mutagenicity TA98 amoxicillin (Amx)**

One-factor variance analysis

SUMMARY

| <i>Groups</i> | <i>Account</i> | <i>Addition</i> | <i>Average</i> | <i>Variance</i> |
|---------------|----------------|-----------------|----------------|-----------------|
| treatment     | 5              | 15              | 3              | 2,5             |
| 100%          | 5              | 6,6             | 1,32           | 0,317           |

## VARIANCE ANALYSIS

| <i>Origin of variations</i> | <i>Sum of squares</i> | <i>Degrees of freedom</i> | <i>mean squares</i> | <i>F</i>    | <i>Probability</i> | <i>Critical value for F</i> |
|-----------------------------|-----------------------|---------------------------|---------------------|-------------|--------------------|-----------------------------|
| Between groups              | 7,056                 | 1                         | 7,056               | 5,009584665 | 0,05558045         | 5,317655072                 |
| Within the groups           | 11,268                | 8                         | 1,4085              |             |                    |                             |
| Total                       | 18,324                | 9                         |                     |             |                    |                             |

- S. typhimurium* mutagenicity TA98 glyphosate (Gly)**

One-factor variance analysis

## SUMMARY

| <i>Groups</i> | <i>Account</i> | <i>Addition</i> | <i>Average</i> | <i>Variance</i> |
|---------------|----------------|-----------------|----------------|-----------------|
| treatment     | 5              | 15              | 3              | 2,5             |
| 100%          | 5              | 4,2             | 0,84           | 0,053           |

## VARIANCE ANALYSIS

| <i>Origin of variations</i> | <i>Sum of squares</i> | <i>Degrees of freedom</i> | <i>mean squares</i> | <i>F</i>    | <i>Probability</i> | <i>Critical value for F</i> |
|-----------------------------|-----------------------|---------------------------|---------------------|-------------|--------------------|-----------------------------|
| Between groups              | 11,664                | 1                         | 11,664              | 9,137485311 | 0,016488376        | 5,317655072                 |
| Within the groups           | 10,212                | 8                         | 1,2765              |             |                    |                             |
| Total                       | 21,876                | 9                         |                     |             |                    |                             |

- S. typhimurium* mutagenicity TA100 amoxicillin (Amx)**

One-factor variance analysis

## SUMMARY

| <i>Groups</i> | <i>Account</i> | <i>Addition</i> | <i>Average</i> | <i>Variance</i> |
|---------------|----------------|-----------------|----------------|-----------------|
| treatment     | 5              | 15              | 3              | 2,5             |
| 100%          | 5              | 32,6            | 6,52           | 60,142          |

## VARIANCE ANALYSIS

| <i>Origin of variations</i> | <i>Sum of squares</i> | <i>Degrees of freedom</i> | <i>mean squares</i> | <i>F</i>    | <i>Probability</i> | <i>Critical value for F</i> |
|-----------------------------|-----------------------|---------------------------|---------------------|-------------|--------------------|-----------------------------|
| Between groups              | 30,976                | 1                         | 30,976              | 0,988985026 | 0,349114486        | 5,317655072                 |
| Within the groups           | 250,568               | 8                         | 31,321              |             |                    |                             |
| Total                       | 281,544               | 9                         |                     |             |                    |                             |

- ***S. typhimurium* mutagenicity TA100 glyphosate (Gly)**

One-factor variance analysis

SUMMARY

| <i>Groups</i> | <i>Account</i> | <i>Addition</i> | <i>Average</i> | <i>Variance</i> |
|---------------|----------------|-----------------|----------------|-----------------|
| treatment     | 5              | 15              | 3              | 2,5             |
| 100%          | 5              | 5,6             | 1,12           | 0,197           |

VARIANCE ANALYSIS

| <i>Origin of variations</i> | <i>Sum of squares</i> | <i>Degrees of freedom</i> | <i>mean squares</i> | <i>F</i>    | <i>Probability</i> | <i>Critical value for F</i> |
|-----------------------------|-----------------------|---------------------------|---------------------|-------------|--------------------|-----------------------------|
| Between groups              | 8,836                 | 1                         | 8,836               | 6,552465703 | 0,033658572        | 5,317655072                 |
| Within the groups           | 10,788                | 8                         | 1,3485              |             |                    |                             |
| Total                       | 19,624                | 9                         |                     |             |                    |                             |
